# Supplementary material
Source: PubMed Central journal article supplement (PMC4423606)

|        |                                                                  |          |     |   |     |   |    |    |    |    |     |
|--------|------------------------------------------------------------------|----------|-----|---|-----|---|----|----|----|----|-----|
| 47 D11 | Heat shock factor-binding protein 1                              | HSBP1    | 9   | 4 | 9   | 5 | 1  | 14 | 2  | 25 | 60  |
| 48 D12 | NO ID                                                            |          |     |   |     |   |    |    |    |    |     |
| 49 E1  | NO ID                                                            |          |     |   |     |   |    |    |    |    |     |
| 50 E2  | Homocysteine-responsive endoplasmic reticulum-resident ubiquitin | HERPUD1  | 44  | 5 | 50  | 6 | 2  | 30 | 6  | 17 | 90  |
| 51 E3  | Glutamate decarboxylase-like protein 1                           | GADL1    | 60  | 6 | 57  | 5 | 14 | 12 | 4  | 13 | 45  |
| 52 E4  | Zinc finger protein 397                                          | ZNF397   | 63  | 7 | 56  | 5 | 1* | 28 | 5  | 17 | 50  |
| 53 E5  | NO ID                                                            |          |     |   |     |   |    |    |    |    |     |
| 54 E6  | NO ID                                                            |          |     |   |     |   |    |    |    |    |     |
| 55 E7  | NO ID                                                            |          |     |   |     |   |    |    |    |    |     |
| 56 E8  | NO ID                                                            |          |     |   |     |   |    |    |    |    |     |
| 57 E9  | Transferrin receptor protein 1                                   | TFRC     | 85  | 6 | 91  | 6 | 23 | 14 | 7  | 16 | 96  |
| 58 E10 | SH3 domain and tetratricopeptide repeat-containing protein 1     | SH3TC1   | 149 | 6 | 149 | 6 | 20 | 16 | 6  | 8  | 100 |
| 59 E11 | Kinectin                                                         | KTN1     | 156 | 6 | 152 | 6 | 27 | 17 | 13 | 15 | 100 |
| 60 E12 | Protein diaphanous homolog 3                                     | DIAPH3   | 138 | 7 | 134 | 6 | 2  | 24 | 8  | 10 | 75  |
| 61 F1  | Exportin-6                                                       | XPO6     | 130 | 6 | 137 | 6 | 13 | 16 | 6  | 11 | 85  |
| 62 F2  | NO ID                                                            |          |     |   |     |   |    |    |    |    |     |
| 63 F3  | Ragulator complex protein LAMTOR1                                | LAMTOR1  | 18  | 5 | 15  | 5 | 2  | 18 | 3  | 34 | 65  |
| 64 F4  | Transthyretin                                                    | TTR      | 16  | 6 | 14  | 5 | 3  | 12 | 2  | 36 | 83  |
| 65 F5  | NO ID                                                            |          |     |   |     |   |    |    |    |    |     |
| 66 F6  | Putative beclin-1-like protein                                   | BECN1P1  | 49  | 5 | 43  | 6 | 1  | 24 | 6  | 24 | 75  |
| 67 F7  | NO ID                                                            |          |     |   |     |   |    |    |    |    |     |
| 68 F8  | Hepatoma-derived growth factor                                   | HDGF     | 27  | 5 | 27  | 6 | 2* | 25 | 6  | 35 | 78  |
| 69 F9  | Protein OSCP1                                                    | OSCP1    | 45  | 6 | 54  | 6 | 1* | 35 | 9  | 31 | 88  |
| 70 F10 | NO ID                                                            |          |     |   |     |   |    |    |    |    |     |
| 71 F11 | NO ID                                                            |          |     |   |     |   |    |    |    |    |     |
| 72 F12 | 4-hydroxyphenylpyruvate dioxygenase                              | HPD      | 45  | 7 | 54  | 6 | 2  | 21 | 6  | 24 | 90  |
| 73 G1  | NO ID                                                            |          |     |   |     |   |    |    |    |    |     |
| 74 G2  | Transmembrane protein 154                                        | TMEM154  | 21  | 5 | 22  | 6 | 2  | 20 | 3  | 32 | 50  |
| 75 G3  | UDP-glucuronosyltransferase 1-8                                  | UGT1A8   | 60  | 8 | 59  | 6 | 4  | 22 | 6  | 19 | 94  |
| 76 G4  | Uncharacterized protein C10orf68                                 | C10orf68 | 71  | 9 | 67  | 6 | 1  | 24 | 7  | 19 | 100 |
| 77 G5  | Zinc finger protein 442                                          | ZNF442   | 75  | 9 | 73  | 6 | 1* | 25 | 9  | 23 | 88  |
| 78 G6  | NO ID                                                            |          |     |   |     |   |    |    |    |    |     |
| 79 G7  | Protein kinase C delta type                                      | PRKCD    | 79  | 8 | 77  | 6 | 1  | 20 | 7  | 12 | 68  |
| 80 G8  | NO ID                                                            |          |     |   |     |   |    |    |    |    |     |
| 81 G9  | NO ID                                                            |          |     |   |     |   |    |    |    |    |     |
| 82 G10 | NO ID                                                            |          |     |   |     |   |    |    |    |    |     |
| 83 G11 | NO ID                                                            |          |     |   |     |   |    |    |    |    |     |
| 84 G12 | Receptor tyrosine-protein kinase erbB-2                          | ERBB2    | 141 | 6 | 141 | 6 | 13 | 13 | 5  | 8  | 104 |

184A1 secretome

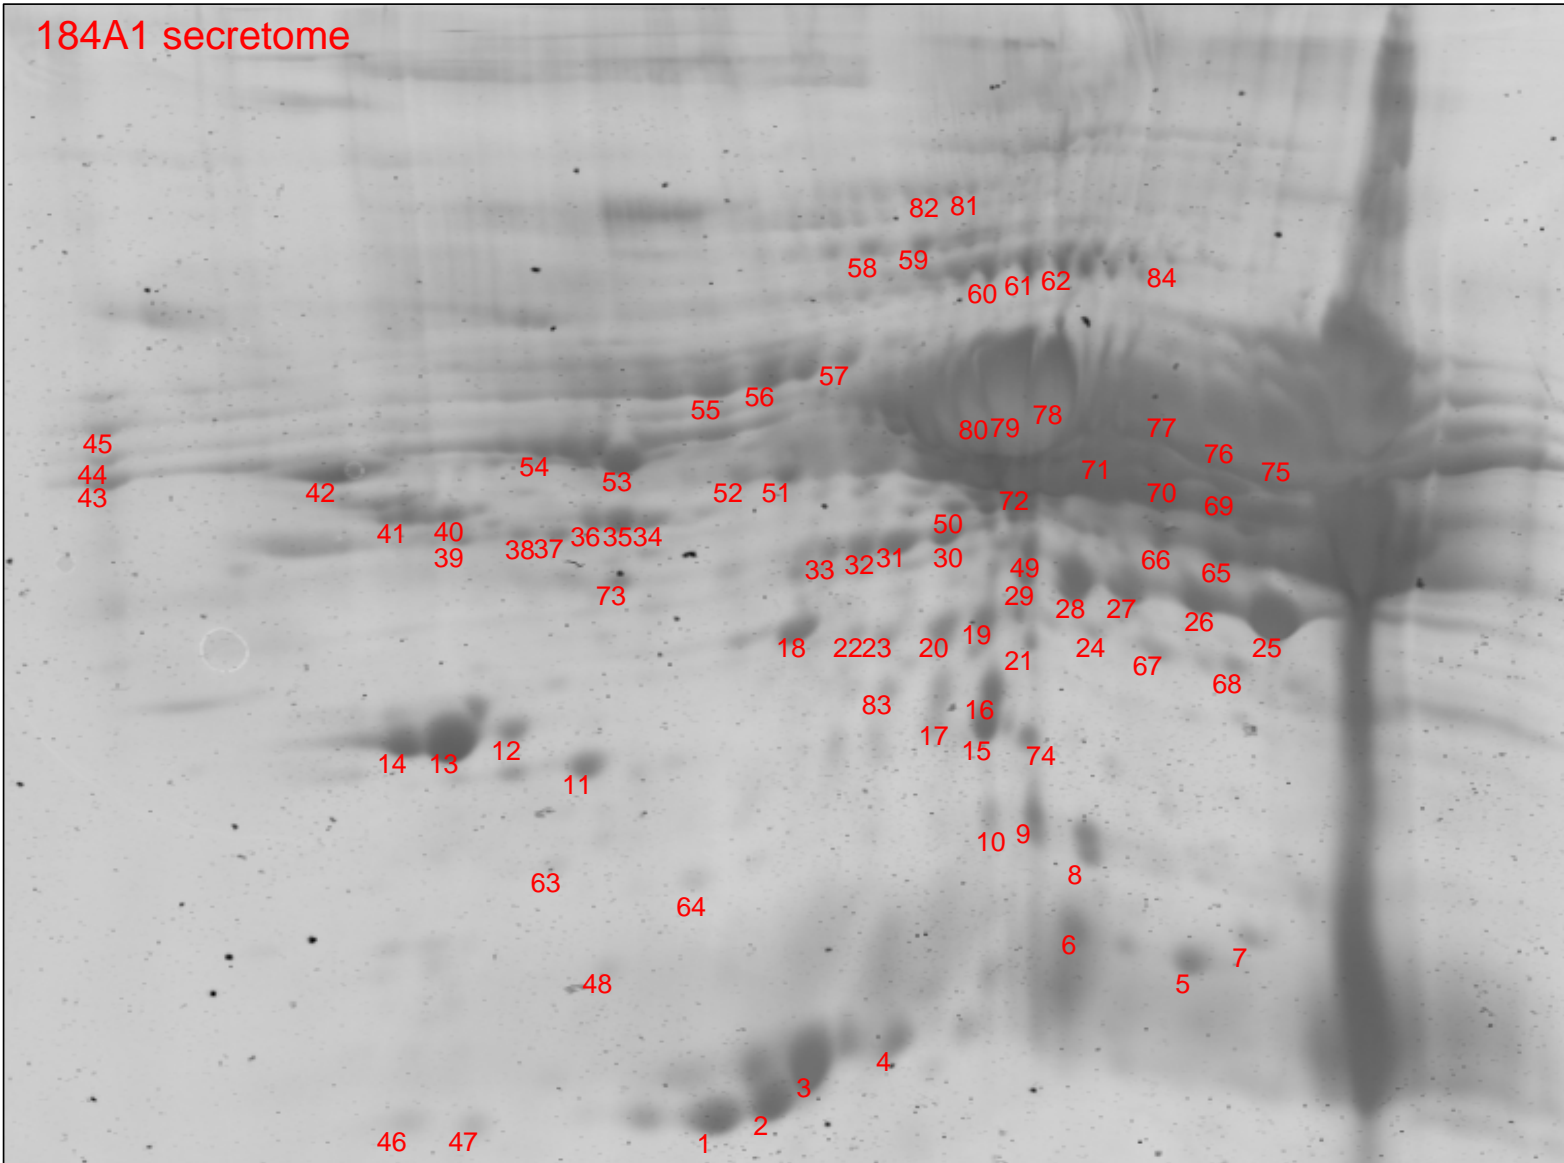

Supplement: NIHMS629066-supplement-Supplementary_PDF_File_2.pdf [file NIHMS629066-supplement-Supplementary_PDF_File_2.pdf]
