# Supplementary material
Source: PubMed Central journal article supplement (PMC4423606)
Supplement: NIHMS629066-supplement-Supplemental_PDF_File_1.pdf [file NIHMS629066-supplement-Supplemental_PDF_File_1.pdf]

Supplementary Materials for:  
Inferring alterations in cell-to-cell communication in HER2+ breast  
cancer using secretome profiling of three cell models

David J. Klinke II<sup>1,2,\*</sup>, Yogesh M. Kulkarni<sup>1</sup>, Yueting Wu<sup>1</sup>, Christina Byrne-Hoffman<sup>3</sup>

<sup>1</sup>Department of Chemical Engineering and Mary Babb Randolph Cancer Center

<sup>2</sup>Department of Microbiology, Immunology, and Cell Biology

<sup>3</sup>Department of Basic Pharmaceutical Sciences

West Virginia University, P.O. Box 6102, Morgantown, WV 26506, USA

\*To whom correspondence should be addressed. E-mail: david.klinke@mail.wvu.edu

January 22, 2014

**This PDF file includes:**

Fig. S1. Three biological replicates of 2-D map of SKBR3 secretome.

Fig. S2. Three biological replicates of 2-D map of BT474 secretome.

Fig. S3. Two technical replicates of 2-D map of 184A1 secretome.

Fig. S4. Protein-protein interaction network inferred from proteins identified in SKBR3 secretome.

Fig. S5. Protein-protein interaction network inferred from proteins identified in BT474 secretome.

Fig. S6. Significant canonical pathways enriched in the BT474 and SKBR3 secretomes.

Table S1. Proteins identified in 184A1 secretome.

## Supplemental Figures

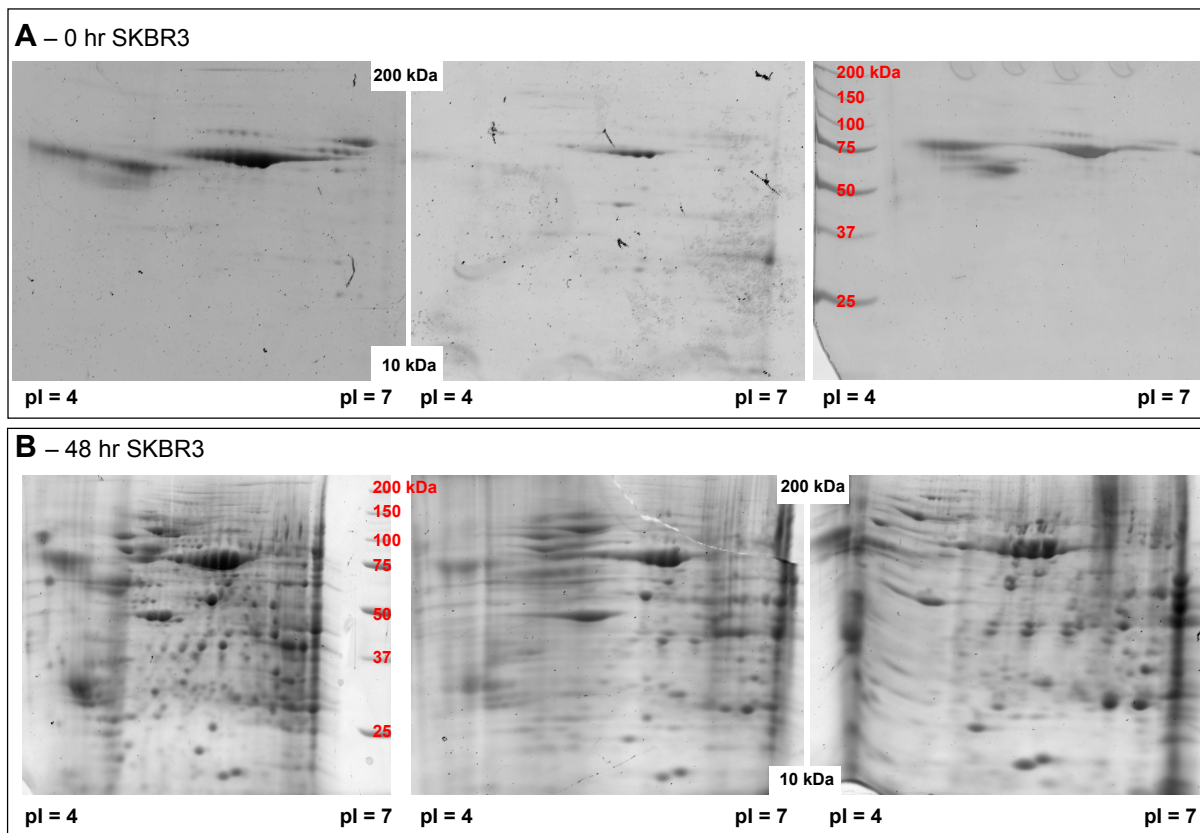

Figure S1: **Three biological replicates of 2-D map of SKBR3 secretome.** (A) Secretome map collected following a brief conditioning period of the media by SKBR3 cells (0 hr sample). Represents residual proteins present in conditioned media following cell wash protocol. (B) Secretome map collected following a 48 hour conditioning period of the media by SKBR3 cells (48 hr sample). All samples were resolved using a IPG strip pH 4-7.

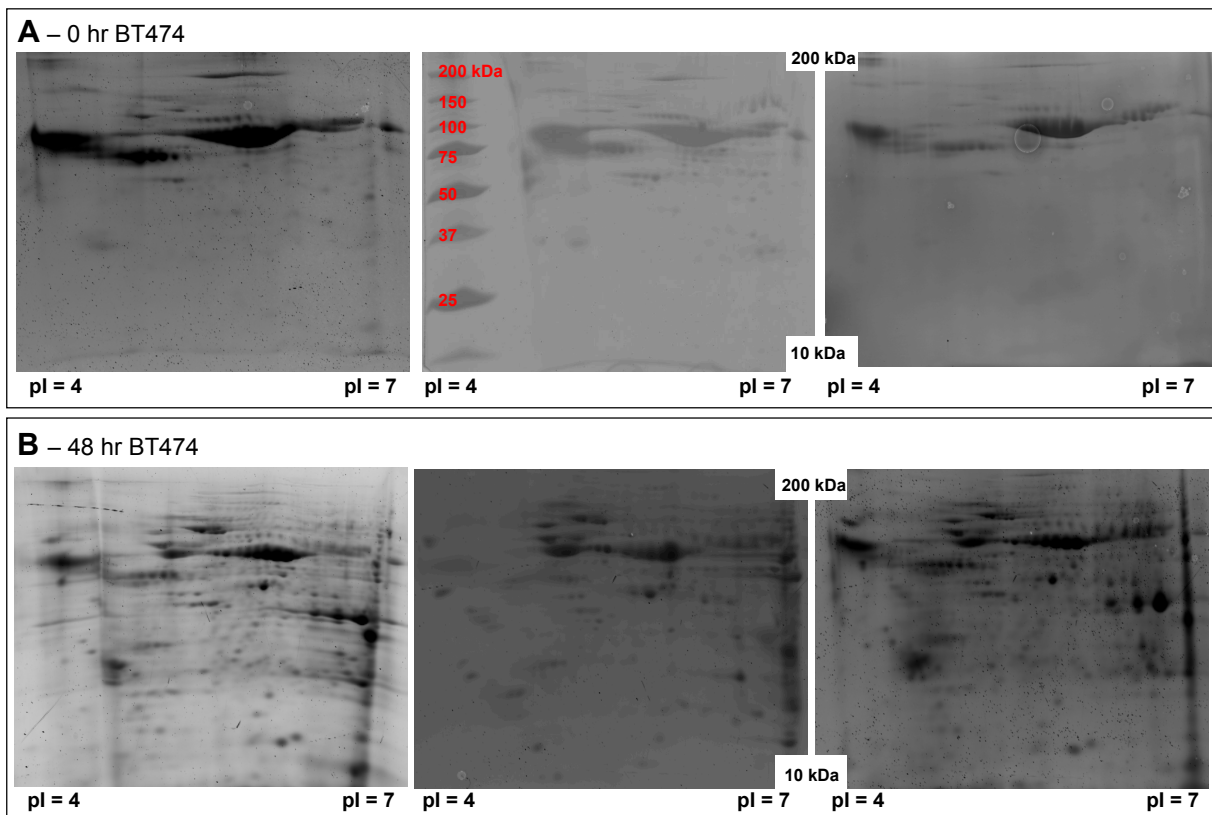

Figure S2: **Three biological replicates of 2-D map of BT474 secretome.** (A) Secretome map collected following a brief conditioning period of the media by BT474 cells (0 hr sample). Represents residual proteins present in conditioned media following cell wash protocol. (B) Secretome map collected following a 48 hour conditioning period of the media by BT474 cells (48 hr sample). All samples were resolved using a IPG strip pH 4-7.

48 hr 184A1

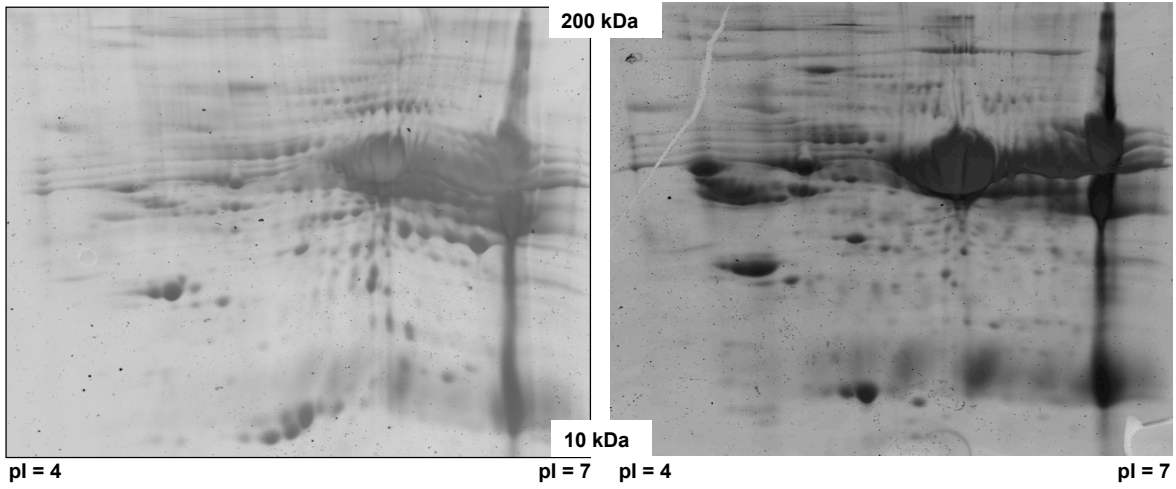

Figure S3: **Two technical replicates of 2-D map of 184A1 secretome.** Secretome maps collected following a 48 hour conditioning period of the media by 184A1 cells (48 hr sample). All samples were resolved using a IPG strip pH 4-7.

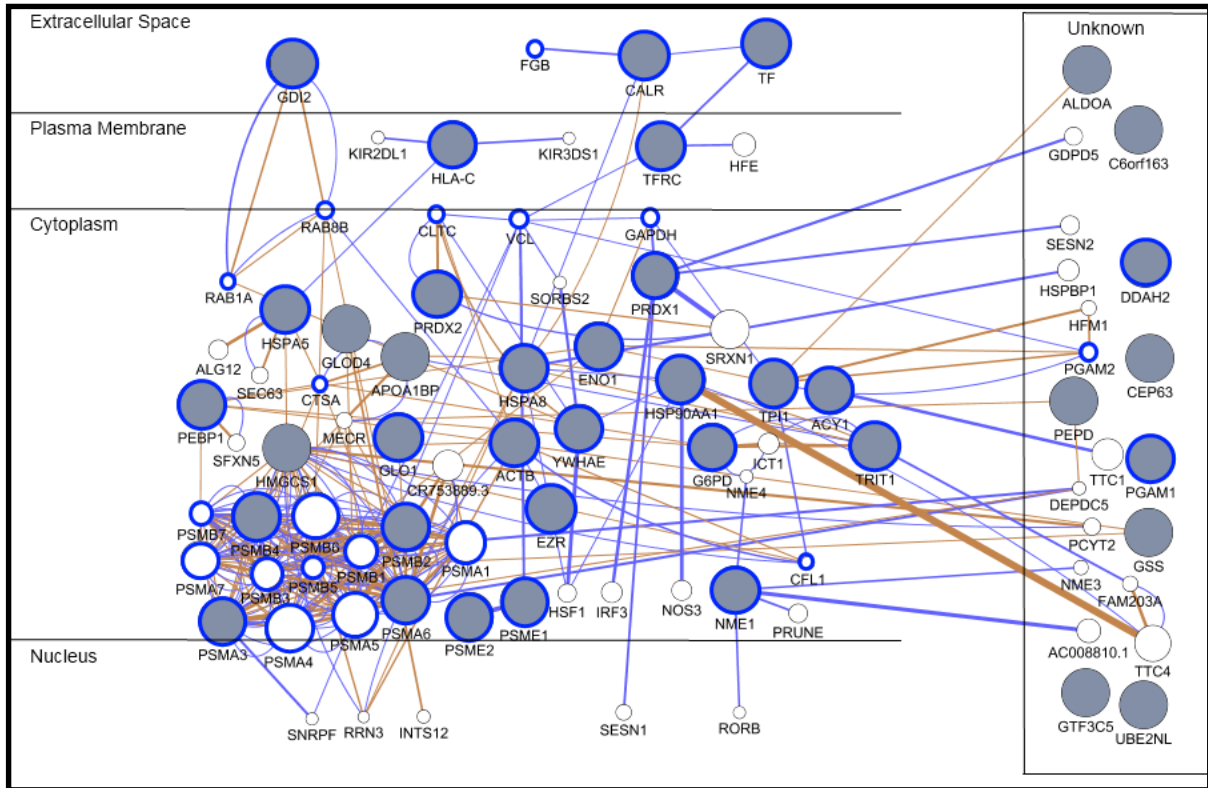

Figure S4: **Protein-protein interaction network inferred from proteins identified in SKBR3 secretome.** Protein-protein interaction networks were constructed in GeneMania using the set of all identified proteins in SKBR3 secretome. The proteins were arranged based upon similarity in subcellular location. Gray circles indicate identified proteins while white circles indicate proteins inferred based upon known interactions with identified proteins. The blue edges indicate experimentally observed protein-protein interactions in Homo Sapiens, while brown edges are predicted protein-protein interactions based on homology with other species. Nodes encircled in blue are found in the Exocarta database, which suggests that they are associated with exosomes.

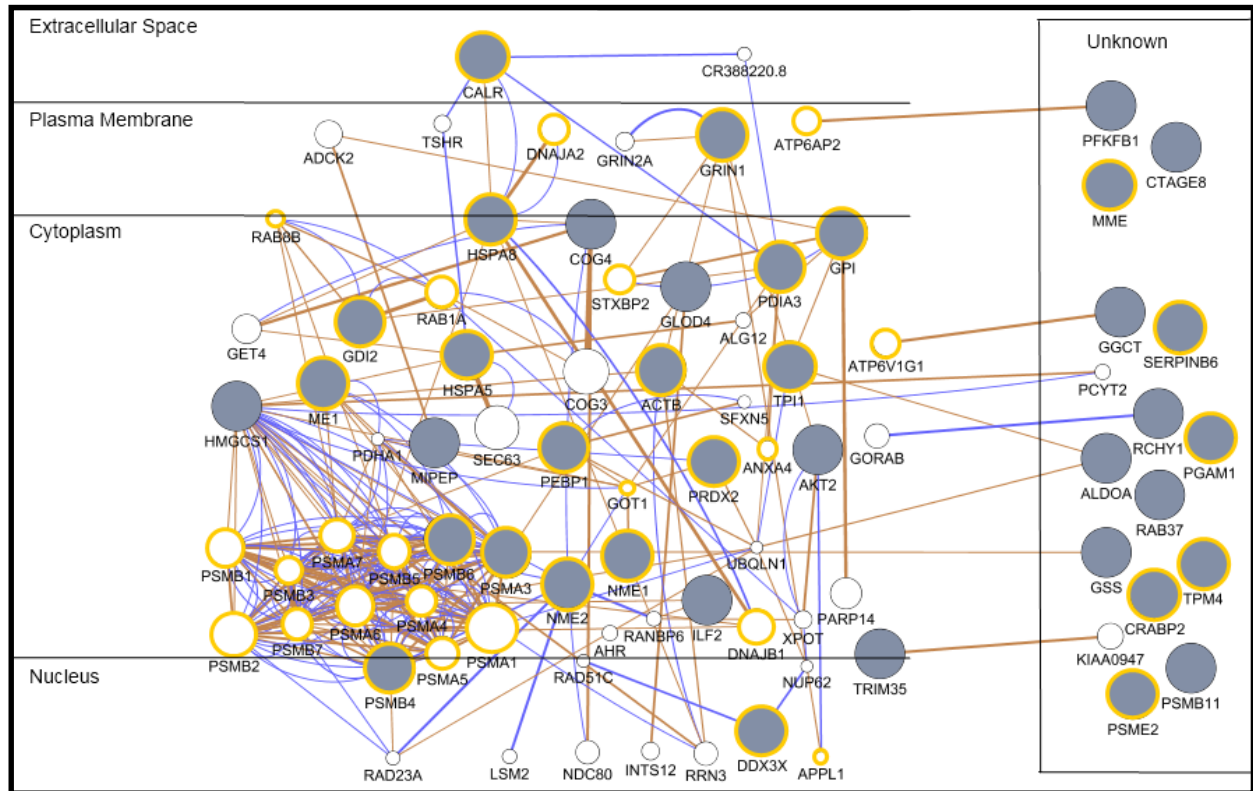

Figure S5: **Protein-protein interaction network inferred from proteins identified in BT474 secretome.** Protein-protein interaction networks were constructed in GeneMania using the set of all identified proteins in BT474 secretome. The proteins were arranged based upon similarity in subcellular location. Gray circles indicate identified proteins while white circles indicate proteins inferred based upon known interactions with identified proteins. The blue edges indicate experimentally observed protein-protein interactions in Homo Sapiens, while brown edges are predicted protein-protein interactions based on homology with other species. Nodes encircled in yellow are found in the Exocarta database, which suggests that they are associated with exosomes.

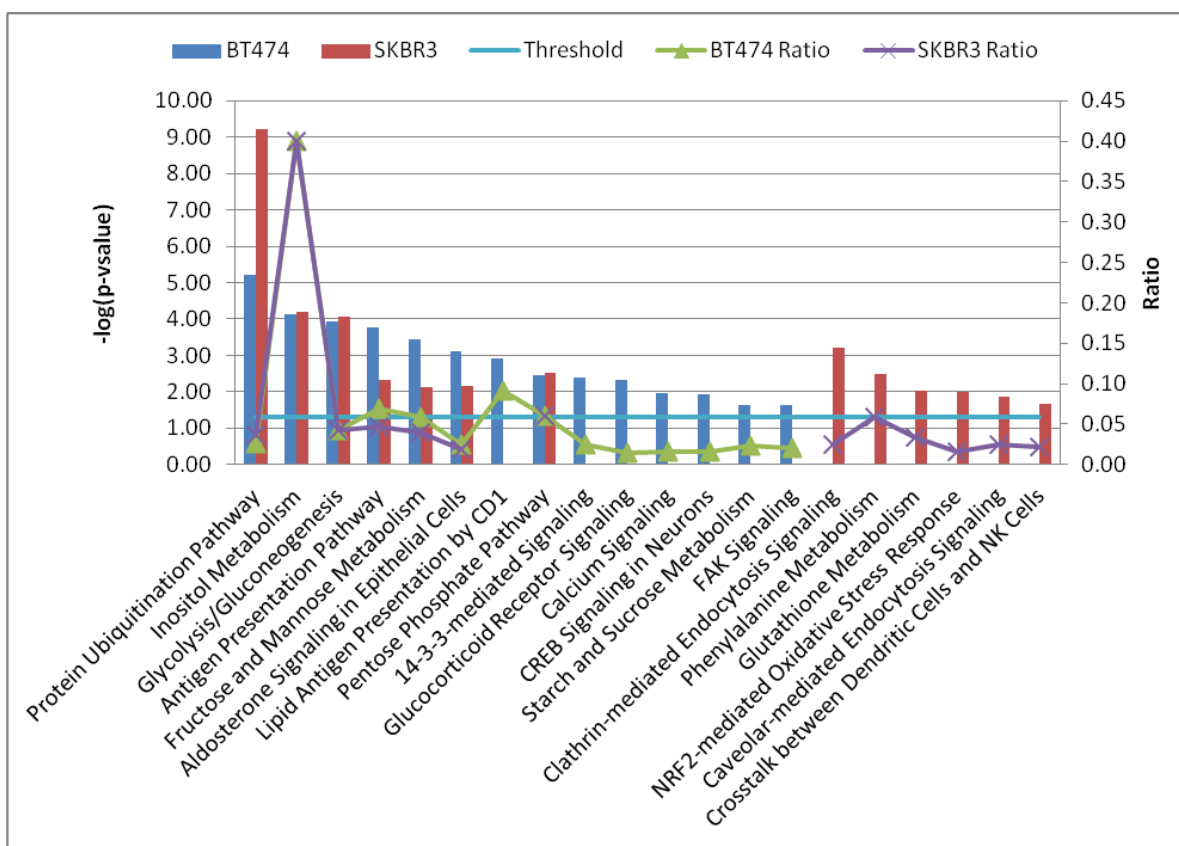

Figure S6: **Significant canonical pathways enriched in the BT474 and SKBR3 secretomes.** Ingenuity Pathway analysis was used to determine enrichment of canonical pathways. The negative of the  $\log_{10}$  (p-value) and ratio (number of focus molecules involved in the pathway/total number of molecules in the pathway) are plotted on the primary and secondary Y-axis, respectively. The significance of enriched pathways for BT474 secretome are indicated by blue columns and the corresponding ratios are indicated by the green triangles. Similarly, significance of enriched pathways for SKBR3 are indicated by red columns and corresponding ratios are indicated by purple X's.

**Table S1. Proteins identified in 184A1 secretome.**

| Protein Name                                                                                  | Gene Symbol           |
|-----------------------------------------------------------------------------------------------|-----------------------|
| 3-ketoacyl-CoA thiolase, mitochondrial                                                        | ACAA2 <sup>‡</sup>    |
| 4-hydroxyphenylpyruvate dioxygenase                                                           | HPD <sup>‡</sup>      |
| Adapter molecule crk                                                                          | CRK <sup>‡</sup>      |
| Alpha-ketoglutarate-dependent dioxygenase alkB homolog 3                                      | ALKBH3                |
| DPY30 domain-containing protein 2                                                             | DYDC2                 |
| ELMO domain-containing protein 1                                                              | ELMOD1                |
| Endomucin                                                                                     | EMCN                  |
| Exportin-6                                                                                    | XPO6                  |
| Glutamate decarboxylase-like protein 1                                                        | GADL1                 |
| Glutathione S-transferase Mu 3                                                                | GSTM3 <sup>‡</sup>    |
| Heat shock factor-binding protein 1                                                           | HSBP1                 |
| Heat shock protein beta-6                                                                     | HSPB6 <sup>‡</sup>    |
| Hepatoma-derived growth factor                                                                | HDGF                  |
| HLA class I histocompatibility antigen, B-41 alpha chain                                      | HLA-B <sup>‡</sup>    |
| HLA class I histocompatibility antigen, B-82 alpha chain                                      | HLA-B <sup>‡</sup>    |
| Homocysteine-responsive endoplasmic reticulum-resident ubiquitin-like domain member 1 protein | HERPUD1               |
| Kinectin                                                                                      | KTN1                  |
| Leucine-rich alpha-2-glycoprotein                                                             | LRG1 <sup>‡</sup>     |
| Magnesium transporter protein 1                                                               | MAGT1                 |
| Mitochondrial Pyruvate dehydrogenase [acetyl-transferring]-phosphatase 1                      | PDP1                  |
| NADH dehydrogenase [ubiquinone] 1 alpha subcomplex subunit 4-like 2                           | NDUFA4L2              |
| Peroxiredoxin-4                                                                               | PRDX4 <sup>‡</sup>    |
| PITH domain-containing protein 1                                                              | PITHD1                |
| Proteasome activator complex subunit 1                                                        | PSME1 <sup>‡</sup>    |
| Protein diaphanous homolog 3                                                                  | DIAPH3                |
| Protein kinase C delta type                                                                   | PRKCD <sup>‡</sup>    |
| Protein OSCP1                                                                                 | OSCP1                 |
| Putative beclin-1-like protein                                                                | BECN1P1               |
| Putative homeobox protein Meis3-like 2                                                        | MEIS3P2               |
| Putative uncharacterized protein ENSP00000344348                                              |                       |
| Regulator complex protein LAMTOR1                                                             | LAMTOR1 <sup>‡</sup>  |
| Ras-GEF domain-containing family member 1B                                                    | RASGEF1B              |
| Ras-related protein Rab-7a                                                                    | RAB7A <sup>‡</sup>    |
| Receptor tyrosine-protein kinase erbB-2                                                       | ERBB2 <sup>‡</sup>    |
| Serpin B6                                                                                     | SERPINB6 <sup>‡</sup> |
| SH3 domain and tetratricopeptide repeat-containing protein 1                                  | SH3TC1                |
| Transferrin receptor protein 1                                                                | TFRC <sup>‡</sup>     |
| Transmembrane emp24 domain-containing protein 10                                              | TMED10 <sup>‡</sup>   |
| Transmembrane protein 154                                                                     | TMEM154               |
| Transmembrane protein 233                                                                     | TMEM233               |
| Transthyretin                                                                                 | TTR <sup>‡</sup>      |
| UDP-glucuronosyltransferase 1-8                                                               | UGT1A8 <sup>‡</sup>   |
| UDP-N-acetylhexosamine pyrophosphorylase                                                      | UAP1                  |
| Uncharacterized protein C10orf68                                                              | C10orf68              |
| Uncharacterized protein C10orf82                                                              | C10orf82              |
| Vesicle-associated membrane protein-associated protein A                                      | VAPA <sup>‡</sup>     |
| Zinc finger protein 397                                                                       | ZNF397                |
| Zinc finger protein 442                                                                       | ZNF442                |
| Zinc finger protein 713                                                                       | ZNF713                |

<sup>‡</sup> indicates identified in exosomes.
